# Supplementary material for: Clinicopathological and Functional Evaluation Reveal NBS1 as a Predictor of Platinum Resistance in Epithelial Ovarian Cancers
Source: PubMed Central journal article supplement (PMC7826685; doi:10.3390/biomedicines9010056), 2021-01-08
Supplement: biomedicines-09-00056-s001.pdf [file biomedicines-09-00056-s001.pdf]

**Supplementary Table S1: Patient demographics and pathological features in ovarian cancer.**

| <b>Characteristics</b>             |                             | <b>Number</b> | <b>Percentages</b> |
|------------------------------------|-----------------------------|---------------|--------------------|
| <b><i>Pathology</i></b>            |                             |               |                    |
|                                    | Serous cystadenocarcinoma   | 178           | 53.9%              |
|                                    | Endometrioid                | 44            | 13.2%              |
|                                    | Clear cell carcinoma        | 24            | 7.2%               |
|                                    | Mucinous cystadenocarcinoma | 46            | 13.8%              |
|                                    | Others                      | 15            | 4.5%               |
|                                    | Mixed                       | 17            | 5.1%               |
|                                    | Missing                     | 7             | 2.3%               |
| <b><i>Grade</i></b>                |                             |               |                    |
|                                    | 1                           | 46            | 13.8%              |
|                                    | 2                           | 60            | 18%                |
|                                    | 3                           | 171           | 51.5%              |
|                                    | Missing                     | 54            | 16.7%              |
| <b><i>Residual tumour</i></b>      |                             |               |                    |
|                                    | None/Microscopic            | 205           | 61.7%              |
|                                    | <1cm                        | 34            | 10.2%              |
|                                    | >1-2 cm                     | 15            | 4.5%               |
|                                    | >2cm                        | 40            | 12%                |
|                                    | Missing                     | 37            | 11.6%              |
| <b><i>FIGO Stage</i></b>           |                             |               |                    |
|                                    | I                           | 123           | 37%                |
|                                    | II                          | 49            | 14.7%              |
|                                    | III                         | 128           | 38.5%              |
|                                    | IV                          | 11            | 3.3%               |
|                                    | Missing                     | 20            | 6.5%               |
| <b><i>Chemotherapy</i></b>         |                             |               |                    |
|                                    | Carboplatin monotherapy     | 81            | 24.3%              |
|                                    | Carboplatin + Paclitaxel    | 86            | 25.9%              |
|                                    | Other regimens *            | 26            | 8%                 |
|                                    | No chemo                    | 23            | 7%                 |
|                                    | Unknown                     | 27            | 22%                |
| <b><i>Platinum sensitivity</i></b> |                             |               |                    |
|                                    | Sensitive                   | 250           | 75.3%              |
|                                    | Resistant                   | 26            | 7.8%               |
|                                    | Unknown                     | 55            | 16.5%              |
| <b><i>Relapse status</i></b>       |                             |               |                    |
|                                    | Progression-free            | 169           | 50.9%              |
|                                    | Progressed/relapsed         | 118           | 35.5%              |
|                                    | Unknown                     | 44            | 13.2%              |

\* Other Regimens included: 3= CAP (Cyclophosphamide, Adriamycin and Cisplatin) 4 = ICON5 Trial 5 = SOCTROC Trial 6 = Carboplatin and Endoxan. 7 = Chlorambucil. For the unknown category, the majority received platinum-based chemo but because the exact regimen was not mentioned clearly in the database, they were considered as unknown. However, for these cases the platinum sensitivity status were clearly mentioned / recorded.

**Supplementary Table S2. NBS1 and ovarian cancers**

|                                               | NBS1_cyto - | NBS1_cyto + | P- value        | NBS1_nuclear - | NBS1_nuclear + | P- value |
|-----------------------------------------------|-------------|-------------|-----------------|----------------|----------------|----------|
| <i>Pathological Type</i>                      |             |             | <b>0.000048</b> |                |                | 0.27     |
| Serous adenocarcinoma                         | 58 (42.6%)  | 78 (57.4%)  |                 | 92 (67.6%)     | 44 (32.4%)     |          |
| Mucinous adenocarcinoma                       | 24 (88.9%)  | 3 (11.1%)   |                 | 23 (85.2%)     | 4 (14.8%)      |          |
| Endometrioid carcinoma                        | 16 (57.1%)  | 12 (42.9%)  |                 | 22 (78.6%)     | 6 (21.4%)      |          |
| Clear cell carcinoma                          | 13 (81.3%)  | 3 (18.8%)   |                 | 11 (68.8%)     | 5 (31.3%)      |          |
| Mixed                                         | 4 (40%)     | 6 (60%)     |                 | 8 (80%)        | 2 (20%)        |          |
| <b>FIGO Stage</b>                             |             |             | 0.528           |                |                | 0.312    |
| I                                             | 49 (57.6%)  | 36 (42.4%)  |                 | 64 (75.3%)     | 21 (24.7%)     |          |
| II                                            | 15 (42.9%)  | 20 (57.1)   |                 | 21 (60%)       | 14 (40%)       |          |
| III                                           | 49 (53.3%)  | 43 (46.7%)  |                 | 65 (70.7)      | 27 (29.3%)     |          |
| IV                                            | 4 (57.1%)   | 3 (42.9%)   |                 | 8 (80%)        | 2 (20%)        |          |
| <b>Tumour Grade</b>                           |             |             | 0.148           |                |                | 0.374    |
| Grade 1                                       | 13 (48.1%)  | 14 (51.9%)  |                 | 22 (81.5%)     | 5 (18.5%)      |          |
| Grade 2                                       | 27 (65.9%)  | 14 (34.1)   |                 | 27 (65.9%)     | 14 (34.1%)     |          |
| Grade 3                                       | 61 (48.8%)  | 64 (51.2%)  |                 | 89 (71.2%)     | 36 (28.8%)     |          |
| <b>Surgical Optimal Debulking</b>             |             |             | 0.427           |                |                | 0.539    |
| Optimally Debulked                            | 94 (55.6%)  | 75 (44.4%)  |                 | 121 (71.6%)    | 48 (28.4%)     |          |
| Not Optimally Debulked                        | 21 (52,5%)  | 19 (47.5%)  |                 | 29 (72.5)      | 11 (27.5%)     |          |
| <b>Residual tumour</b>                        |             |             | 0.759           |                |                | 0.525    |
| None/Microscopic                              | 74 (54%)    | 63 (46%)    |                 | 102 (74.5%)    | 35 (25.5%)     |          |
| <1cm                                          | 17 (63%)    | 10 (37%)    |                 | 17 (63%)       | 10 (37%)       |          |
| 1-2 cm                                        | 6 (46.2%)   | 7 (53.8%)   |                 | 8 (61.5%)      | 5 (38.5%)      |          |
| >2cm                                          | 16 (53.3%)  | 14 (46.7%)  |                 | 22 (73.3%)     | 8 (26.7%)      |          |
| <b>Measurable Disease Before ChemoTherapy</b> |             |             | 0.543           |                |                | 0.252    |
| Non                                           | 77 (55%)    | 63 (45%)    |                 | 102 (72.9%)    | 38 (27.1%)     |          |
| Measurable                                    | 35 (54.7%)  | 29 (45.3%)  |                 | 43 (67.2%)     | 21 (32.8%)     |          |
